# Supplementary material for: Molten salt synthesis of carbon-supported Pt–rare earth metal nanoalloy catalysts for oxygen reduction reaction
Source: Royal Society of Chemistry journal article supplement (doi:10.1039/d1ra09400a), 2022-01-01
Supplement: d1ra09400a1.pdf [file d1ra09400a1.pdf]

## One-step Molten Salt Synthesis of Carbon-Supported Pt-Rare Earth Metal Nanoalloy Catalysts for Oxygen Reduction Reaction

Yulin Jiang, <sup>[a]</sup>, Tao Fu, <sup>[b],\*</sup> Jiaxiang Liu, <sup>[c]</sup> Jinbao Zhao, <sup>\* [a], [c]</sup> Bing Li, <sup>[b], [d]</sup> Zhenjie Chen <sup>[a]</sup>

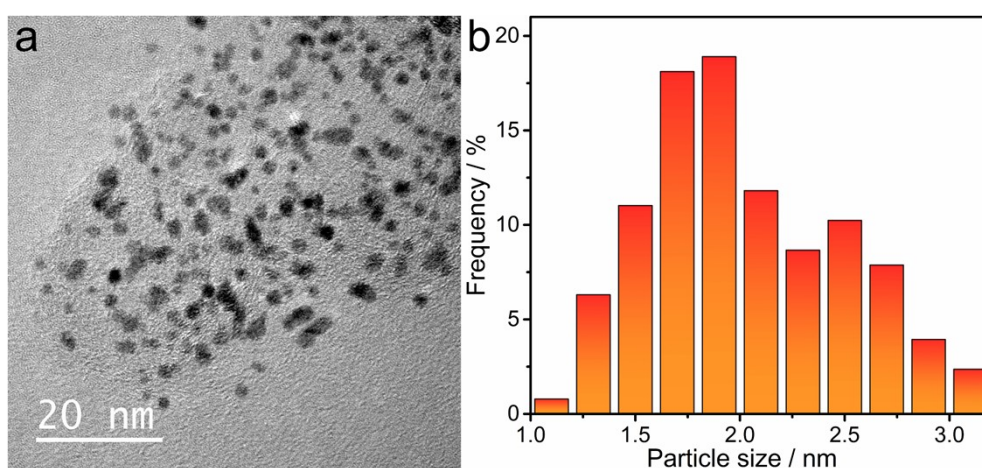

**Figure. S1** (a) Typical TEM image of commercial Pt/C catalyst and its corresponding particle size distribution histogram (b).

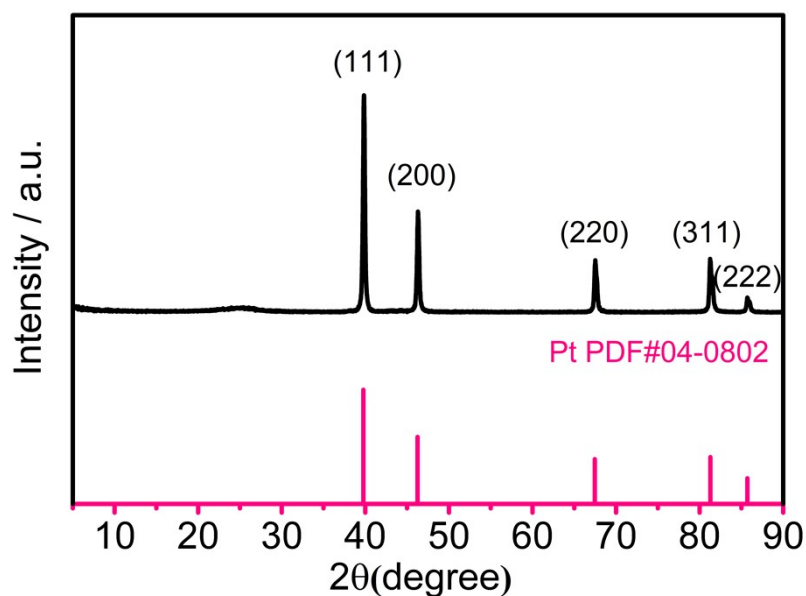

**Figure. S2** XRD patterns of the materials synthesized without LiCl

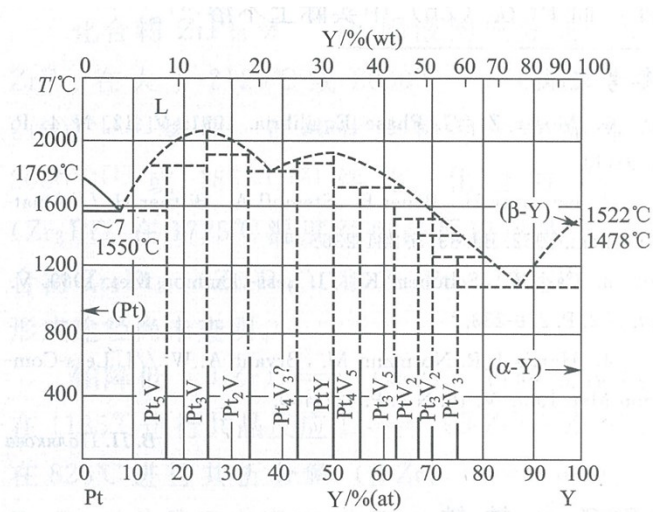

**Figure. S3** Phase diagrams of Pt-Y alloy.[1]

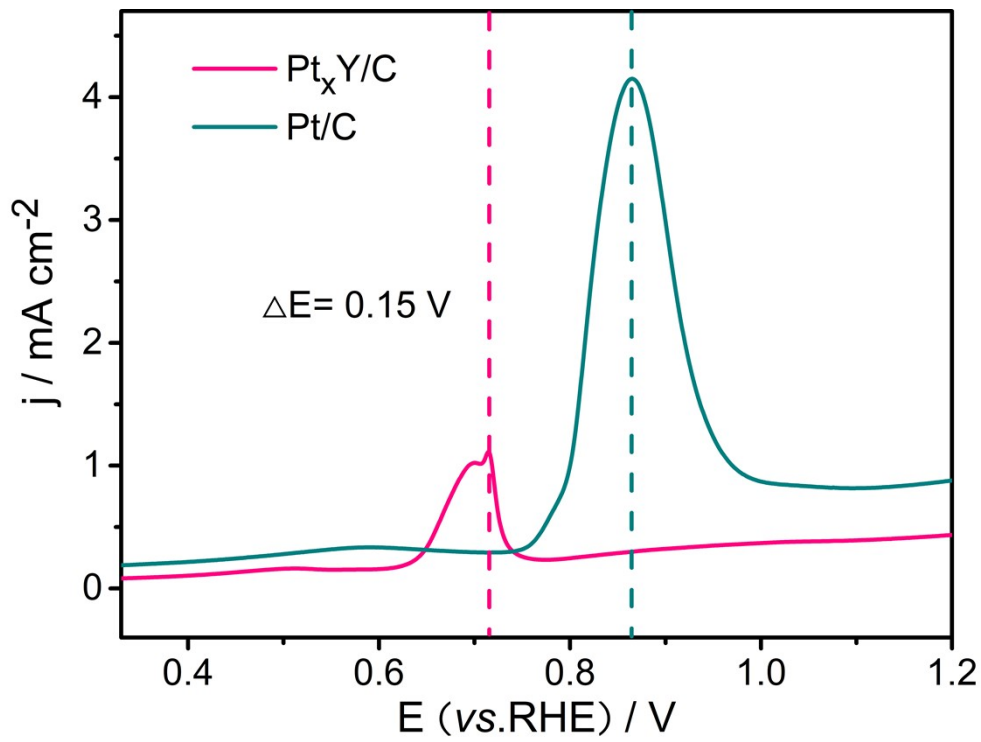

**Figure. S4** CO-stripping CO stripping (first sweep) on Pt<sub>x</sub>Y/C and Pt/C in 0.1 M HClO<sub>4</sub>

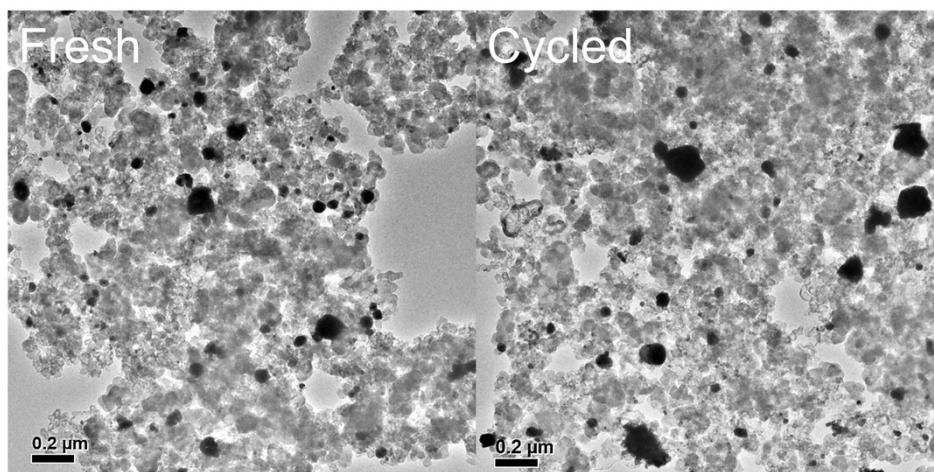

**Figure. S5** Representative TEM images of fresh and cycled  $\text{Pt}_x\text{Y/C}$  synthesized.

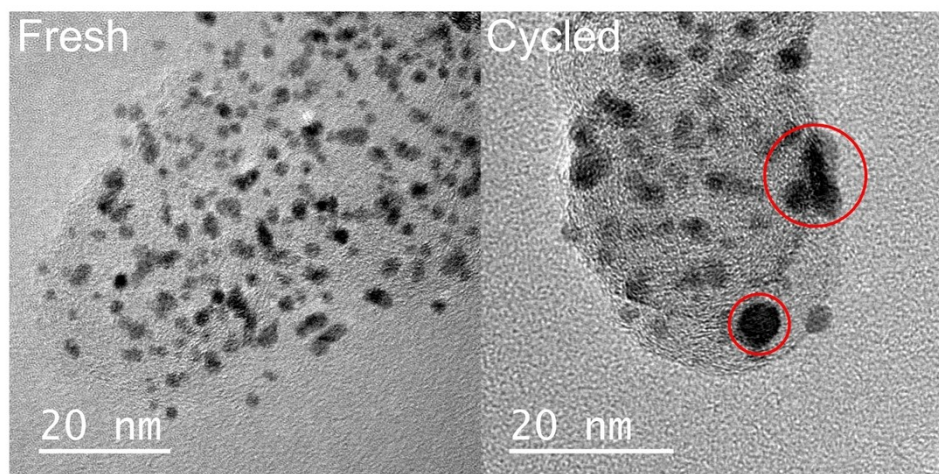

**Figure. S6** Representative TEM images of fresh and cycled commercial Pt/C catalyst.

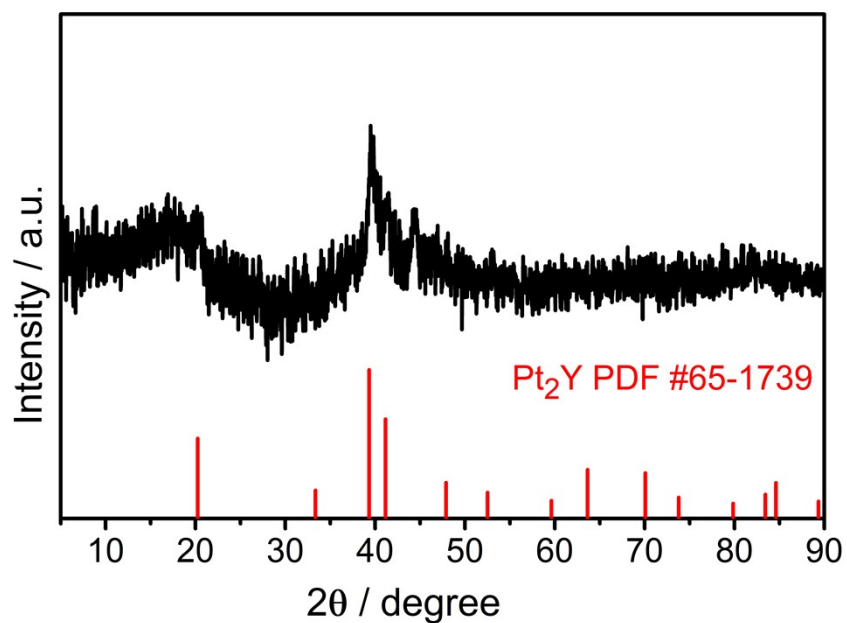

**Figure. S7** XRD patterns of the  $Pt_xY/C$  after ADT.

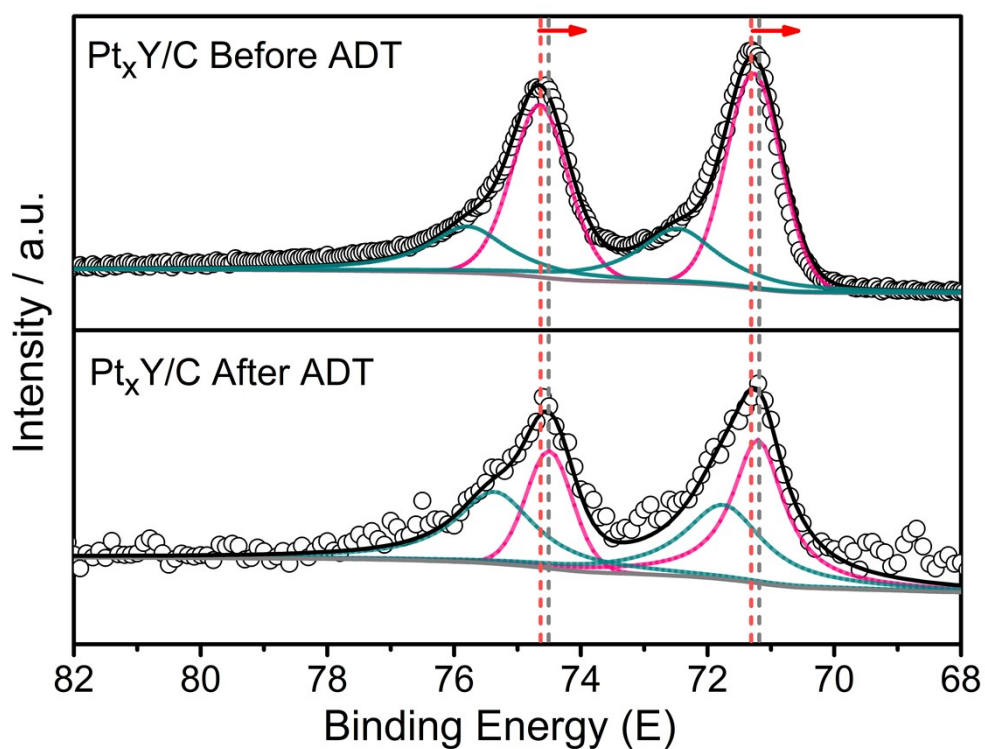

**Figure. S8** XPS spectra of (a) Pt 4f core levels for the  $Pt_xY/C$  prepared and (b) Y 3d core levels for the  $Pt_xY/C$  prepared.

**Table S1** Characteristic datas for Pt<sub>x</sub>Y or Pt<sub>x</sub>Y/C catalysts, including synthesis method , the shift of half-wave potential , mass activity and specific activity at 0.9 V (vs. RHE) and the accurate XRD demonstration.

| Source                            | Synthesis Method          | The shift of half-wave potential when compared with Pt/C. | Mass activity & Specific activity at 0.9 V (vs.RHE)                                                                                                                                                      | LSV scan rate | accurate XRD demonstration                                            |
|-----------------------------------|---------------------------|-----------------------------------------------------------|----------------------------------------------------------------------------------------------------------------------------------------------------------------------------------------------------------|---------------|-----------------------------------------------------------------------|
| This report                       | Molten salt method        | 25 mV                                                     | MA: 0.26 A/mg <sub>Pt</sub> while Pt/C is 0.12 A/mg <sub>Pt</sub> .<br>SA: 1.52 mA/cm <sub>Pt</sub> <sup>2</sup> while Pt/C is 0.22 mA/cm <sub>Pt</sub> <sup>2</sup> .                                   | 10 mV/s       | Pt <sub>2</sub> Y 、 Pt <sub>3</sub> Y                                 |
| Brandiele et al. <sup>[2]</sup>   | Laser ablation synthesis  | 29 mV                                                     | MA: 0.483±0.009 A/mg <sub>Pt</sub> while Pt/C is 0.211 ± 0.008 A/mg <sub>Pt</sub> .<br>SA: 0.562 ± 0.031 mA/cm <sub>Pt</sub> <sup>2</sup> while Pt/C is 0.562 ± 0.031 mA/cm <sub>Pt</sub> <sup>2</sup> . | 20 mV/s       | Pt <sub>2</sub> Y 、 Pt <sub>3</sub> Y                                 |
| Schwammlein et al. <sup>[3]</sup> | Hydrogen reduction method | -20 mV                                                    | MA: 0.106±0.035 A/mg <sub>Pt</sub> while Pt/C is 0.270 ± 0.005 A/mg <sub>Pt</sub> .<br>SA: 0.740 ± 0.170 mA/cm <sub>Pt</sub> <sup>2</sup> while Pt/C is 0.385 ± 0.040 mA/cm <sub>Pt</sub> <sup>2</sup> . | 10 mV/s       | Pt <sub>2</sub> Y 、 Pt <sub>3</sub> Y                                 |
| Roy et al. <sup>[4]</sup>         | Hydrogen reduction method | 10mV                                                      | MA: 0.43 A/mg <sub>Pt</sub> while Pt/C is ~ 0.27 A/mg <sub>Pt</sub> .<br>SA: 2 mA/cm <sub>Pt</sub> <sup>2</sup> while Pt/C is ~ 1 mA/cm <sub>Pt</sub> <sup>2</sup> .                                     | 50 mV/s       | Pt <sub>3</sub> Y 、 Pt <sub>5</sub> Y (fcc 、 hex) 、 Pt <sub>2</sub> Y |
| Yoo et al. <sup>[5]</sup>         | Sputtering technique      | 98 mV                                                     | SA : 25.5 mA/cm <sub>Pt</sub> <sup>2</sup> while Pt is 1.6 mA/cm <sub>Pt</sub> <sup>2</sup> .                                                                                                            | 10 mV/s       | Pt <sub>3</sub> Y                                                     |

## References

1. Н. П. Лякишев, Q Guo, et al. Manual of Phase Diagram of Metal Binary System, Chemical Industry Press, China, 2008
2. R. Brandiele, A. Guadagnini, L. Girardi, G. Dražić, M. C. Dalconi, G. A. Rizzi, V. Amendola and C. Durante, *Catal. Sci. Technol.*, **2020**, 10, 4503-4508, DOI: 10.1039/d0cy00983k
3. J. N. Schwammlein, G. S. Harzer, P. Pfandner, A. Blankenship, H. A. El-Sayed and H. A. Gasteiger, *J. Electrochem. Soc.*, **2018**, 165, J3173-J3185.
4. C. Roy, B. P. Knudsen, C. M. Pedersen, A. Velazquez-Palenzuela, L. H. Christensen, C. D. Damsgaard, I. E. L. Stephens and I. Chorkendorff, *ACS Catal.*, **2018**, 8, 2071-2080.
5. S. J. Yoo, S. J. Hwang, J.-G. Lee, S.-C. Lee, T.-H. Lim, Y.-E. Sung, A. Wieckowski and S.-K. Kim, *Energy Environ. Sci.*, **2012**, 5, 7521-7525.
